# Supplementary material for: Diversity Indices of Plant Communities and Their Rhizosphere Microbiomes: An Attempt to Find the Connection
Source: MDPI journal article supplement (doi:10.3390/microorganisms9112339), 2021-11-12
Supplement: s1 [file s1]

Table S1: Geobotanical description of the sampling sites.

| Rye field description                                                                                                                                                                                                      |                              | Fallow site description                                                                                                                                                                                                                                                                                                                                                                                                                                                                                                                                                              |
|----------------------------------------------------------------------------------------------------------------------------------------------------------------------------------------------------------------------------|------------------------------|--------------------------------------------------------------------------------------------------------------------------------------------------------------------------------------------------------------------------------------------------------------------------------------------------------------------------------------------------------------------------------------------------------------------------------------------------------------------------------------------------------------------------------------------------------------------------------------|
| Rye crop field. The crops are uniform, of good quality, without visible signs of diseases and pests. The height of rye plants is 1.5–1.65 m, and the total vegetation cover is 85–90%, with 10–15% bare soil between rows. |                              | Forb and cereal meadow. Agricultural land previously used as hayfield. Over the past several years, haymaking and other activities have not been carried out. The grass is high, dense, 100% closed. The height of the generative parts of plants reaches 1.0 m. There are two synusiae in the meadow. Main synusia formed by <i>Galium</i> and <i>Dactylis</i> (referred to as PolyG); smaller areas are occupied by cereal synusia, with the co-dominance of several species of cereals such as <i>Dactylis</i> , <i>Bromopsis</i> , and <i>Alopecurus</i> (referred to as PolyC). |
| Genus                                                                                                                                                                                                                      | Plant abundance on rye field | Plant abundance on fallow site                                                                                                                                                                                                                                                                                                                                                                                                                                                                                                                                                       |
| <i>Achillea</i>                                                                                                                                                                                                            |                              | <1                                                                                                                                                                                                                                                                                                                                                                                                                                                                                                                                                                                   |
| <i>Alchemilla</i>                                                                                                                                                                                                          |                              | 5                                                                                                                                                                                                                                                                                                                                                                                                                                                                                                                                                                                    |
| <i>Alopecurus</i>                                                                                                                                                                                                          |                              | 3                                                                                                                                                                                                                                                                                                                                                                                                                                                                                                                                                                                    |
| <i>Bromopsis</i>                                                                                                                                                                                                           |                              | 7                                                                                                                                                                                                                                                                                                                                                                                                                                                                                                                                                                                    |
| <i>Centaurea</i>                                                                                                                                                                                                           |                              | 1                                                                                                                                                                                                                                                                                                                                                                                                                                                                                                                                                                                    |
| <i>Cerastium</i>                                                                                                                                                                                                           | 5                            |                                                                                                                                                                                                                                                                                                                                                                                                                                                                                                                                                                                      |
| <i>Dactylis</i>                                                                                                                                                                                                            |                              | 15–50                                                                                                                                                                                                                                                                                                                                                                                                                                                                                                                                                                                |
| <i>Fragaria</i>                                                                                                                                                                                                            |                              | 7–12                                                                                                                                                                                                                                                                                                                                                                                                                                                                                                                                                                                 |
| <i>Galium</i>                                                                                                                                                                                                              | <1                           | 5–20                                                                                                                                                                                                                                                                                                                                                                                                                                                                                                                                                                                 |
| <i>Myosotis</i>                                                                                                                                                                                                            | <1                           |                                                                                                                                                                                                                                                                                                                                                                                                                                                                                                                                                                                      |
| <i>Plantago</i>                                                                                                                                                                                                            | <1                           |                                                                                                                                                                                                                                                                                                                                                                                                                                                                                                                                                                                      |
| <i>Poa</i>                                                                                                                                                                                                                 | 7                            |                                                                                                                                                                                                                                                                                                                                                                                                                                                                                                                                                                                      |
| <i>Secale</i>                                                                                                                                                                                                              | 80–85                        |                                                                                                                                                                                                                                                                                                                                                                                                                                                                                                                                                                                      |
| <i>Stellaria</i>                                                                                                                                                                                                           | 5                            | 5                                                                                                                                                                                                                                                                                                                                                                                                                                                                                                                                                                                    |
| <i>Taraxacum</i>                                                                                                                                                                                                           |                              | 7                                                                                                                                                                                                                                                                                                                                                                                                                                                                                                                                                                                    |
| <i>Trifolium</i>                                                                                                                                                                                                           |                              | 3                                                                                                                                                                                                                                                                                                                                                                                                                                                                                                                                                                                    |

*Vicia*

7

*Viola*

1–2

---
